# Supplementary figures and images for: Analysis of the antimicrobial activity ofLactobacillus plantarumYM-4-3: implications of suitable conditions for extending the shelf life of fermented soybean products
Source: Royal Society of Chemistry journal article supplement (doi:10.1039/c9fo00672a), 2019-01-01

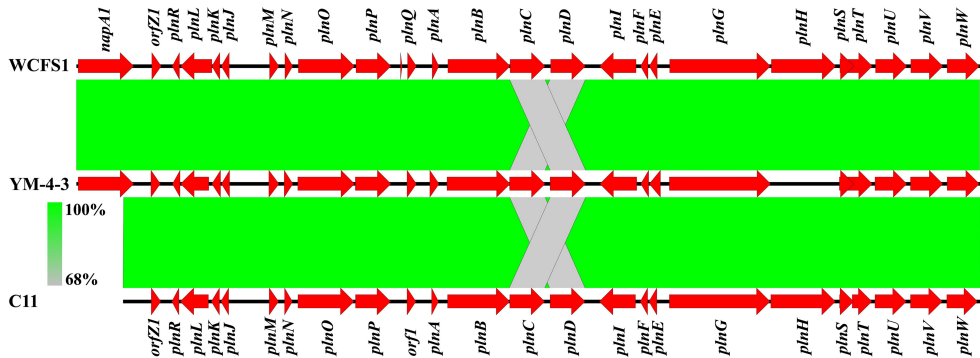

Supplement: c9fo00672a2.pdf [file c9fo00672a2.pdf]
